# Supplementary material for: Trapping of spermine, Kukoamine A, and polyamine toxin blockers in GluK2 kainate receptor channels
Source: Springer Nature journal article supplement (doi:10.1038/s41467-024-54538-x), 2024-11-26
Supplement: MOESM1 [file 41467_2024_54538_MOESM1_ESM.pdf]

## **Supplementary Information**

### **Trapping of spermine, Kukoamine A, and polyamine toxin blockers in GluK2 kainate receptor channels**

Shanti Pal Gangwar<sup>1,#</sup>, Maria V. Yelshanskaya<sup>1,#</sup>, Muhammed Aktolun<sup>2,#</sup>, Laura Y.  
Yen<sup>1,3</sup>, Thomas P. Newton<sup>1,4</sup>, Kristian Strømgaard<sup>5</sup>, Maria G. Kurnikova<sup>2</sup> and  
Alexander I. Sobolevsky<sup>1\*</sup>

<sup>1</sup> Department of Biochemistry and Molecular Biophysics, Columbia University, 650 West  
168<sup>th</sup> Street, New York, NY 10032, USA

<sup>2</sup> Department of Chemistry, Carnegie Mellon University, Pittsburgh, PA 15213, USA

<sup>3</sup> Cellular and Molecular Physiology and Biophysics Graduate Program, Columbia  
University Irving Medical Center, 630 West 168<sup>th</sup> Street, New York, NY 10032, USA

<sup>4</sup> Integrated Program in Cellular, Molecular and Biomedical Studies, Columbia University  
Irving Medical Center, 630 West 168<sup>th</sup> Street, New York, NY 10032, USA

<sup>5</sup> Center for Biopharmaceuticals, Department of Drug Design and Pharmacology,  
University of Copenhagen, Jagtvej 162, DK-2100 Copenhagen, Denmark

# These authors contributed equally to this work

\* Correspondence and requests for materials should be addressed to A.I.S. (Email:  
as4005@cumc.columbia.edu; Tel: 212-305-4249)

#### **This PDF file includes:**

Supplementary Figures 1-7

Supplementary Tables 1-3

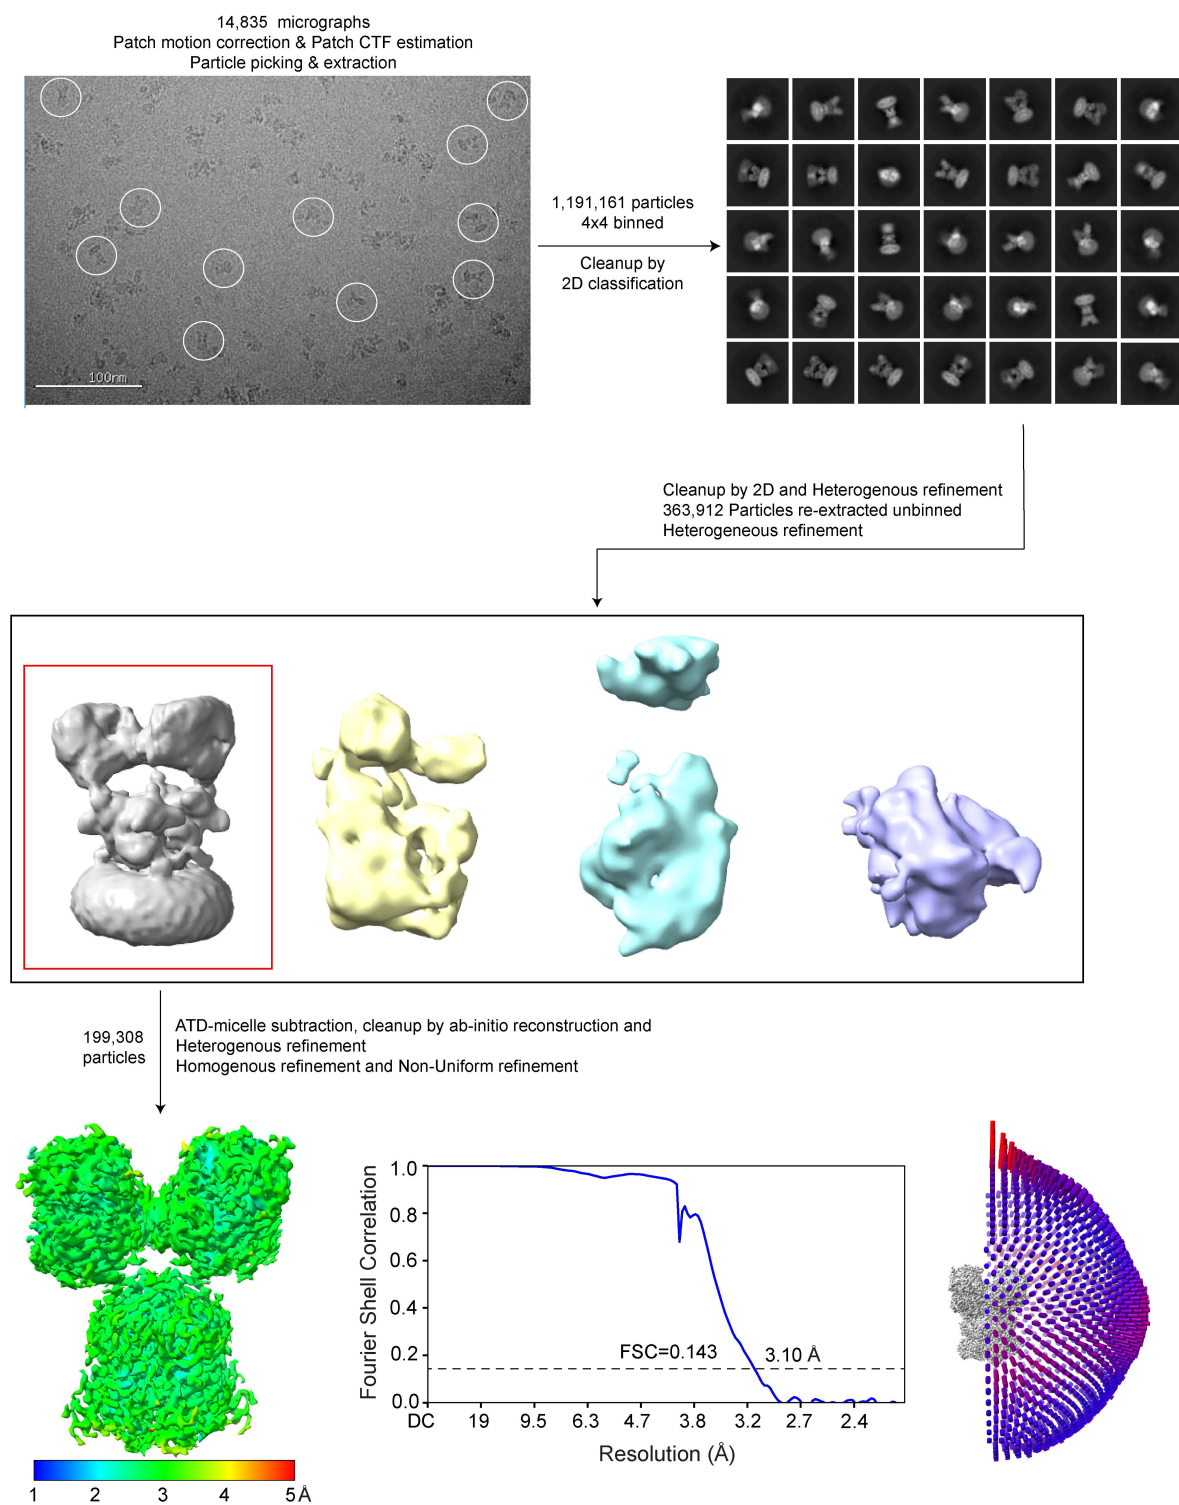

**Supplementary Fig. 1. Overview of cryo-EM for GluK2<sub>NpTx8</sub>.** On the top, 3D reconstruction workflow, with a representative micrograph and 2D class averages. At the bottom, the local resolution presented as coloring of the GluK2<sub>NpTx8</sub> map, FSC curve, and Euler angle distribution of particles contributing to the final reconstruction, with larger red cylinders representing orientations comprising more particles.

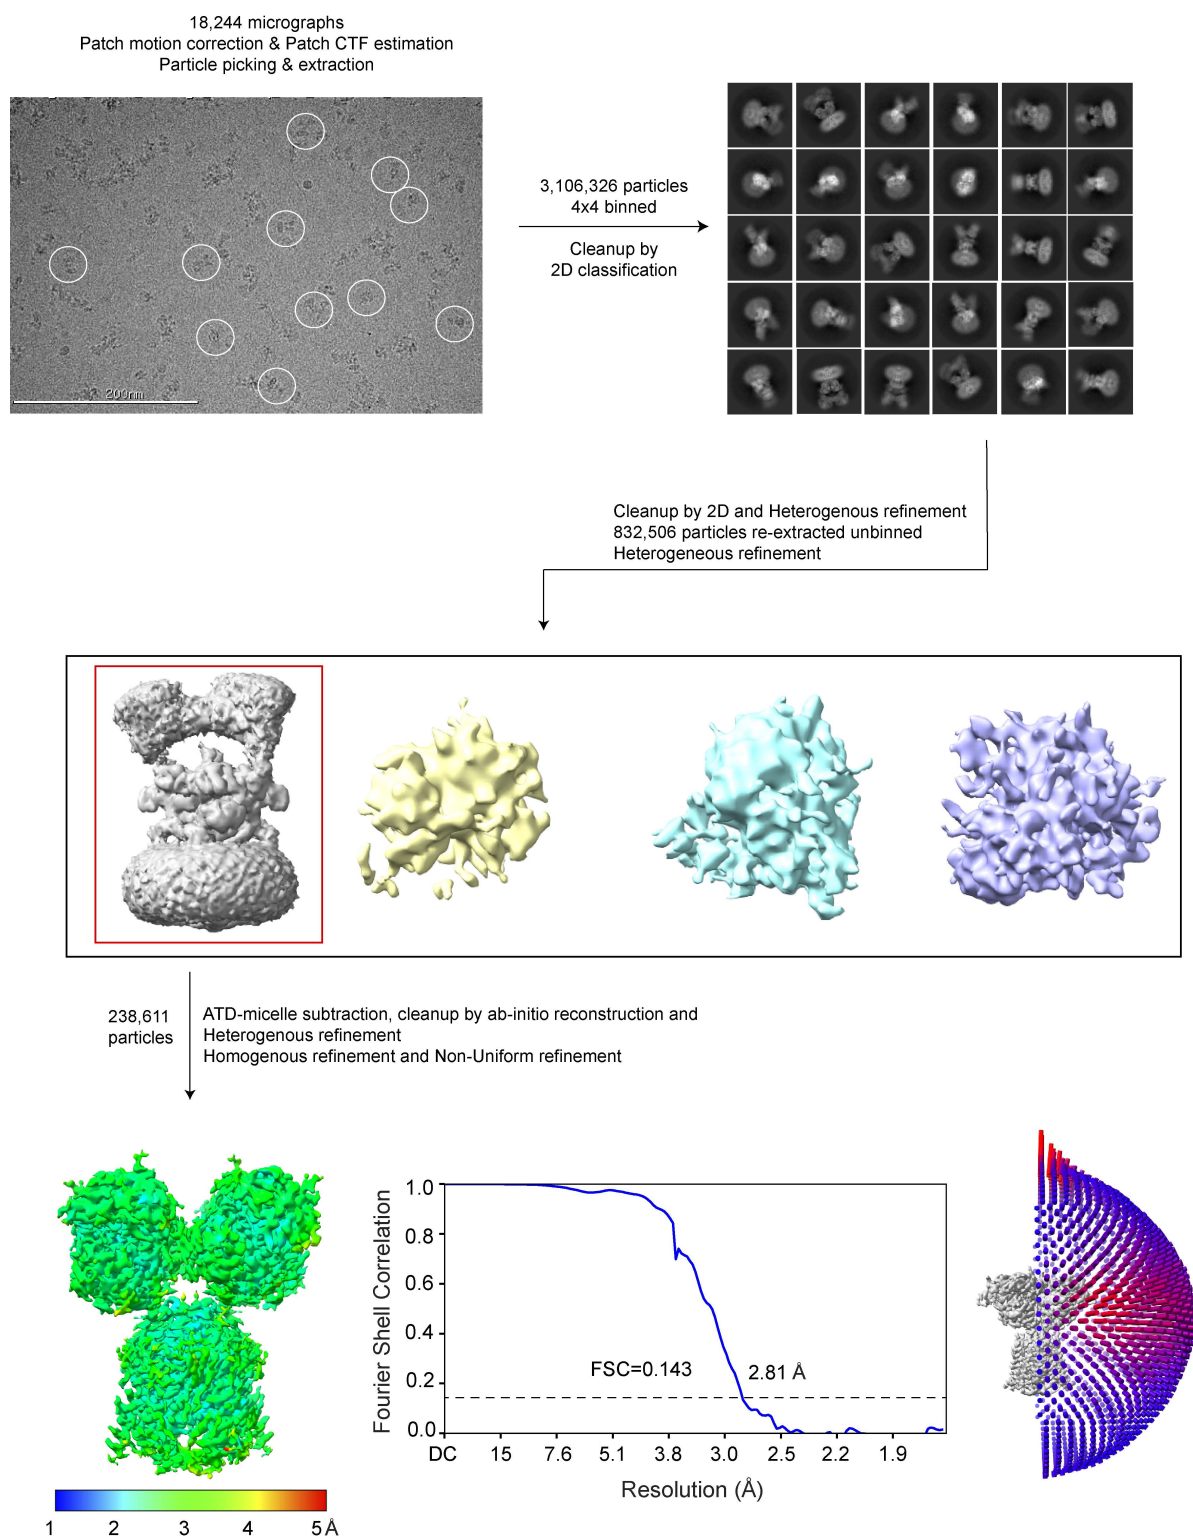

**Supplementary Fig. 2. Overview of cryo-EM for GluK2<sub>PhTx74</sub>.** On the top, 3D reconstruction workflow, with a representative micrograph and 2D class averages. At the bottom, the local resolution presented as coloring of the GluK2<sub>PhTx74</sub> map, FSC curve, and Euler angle distribution of particles contributing to the final reconstruction, with larger red cylinders representing orientations comprising more particles.

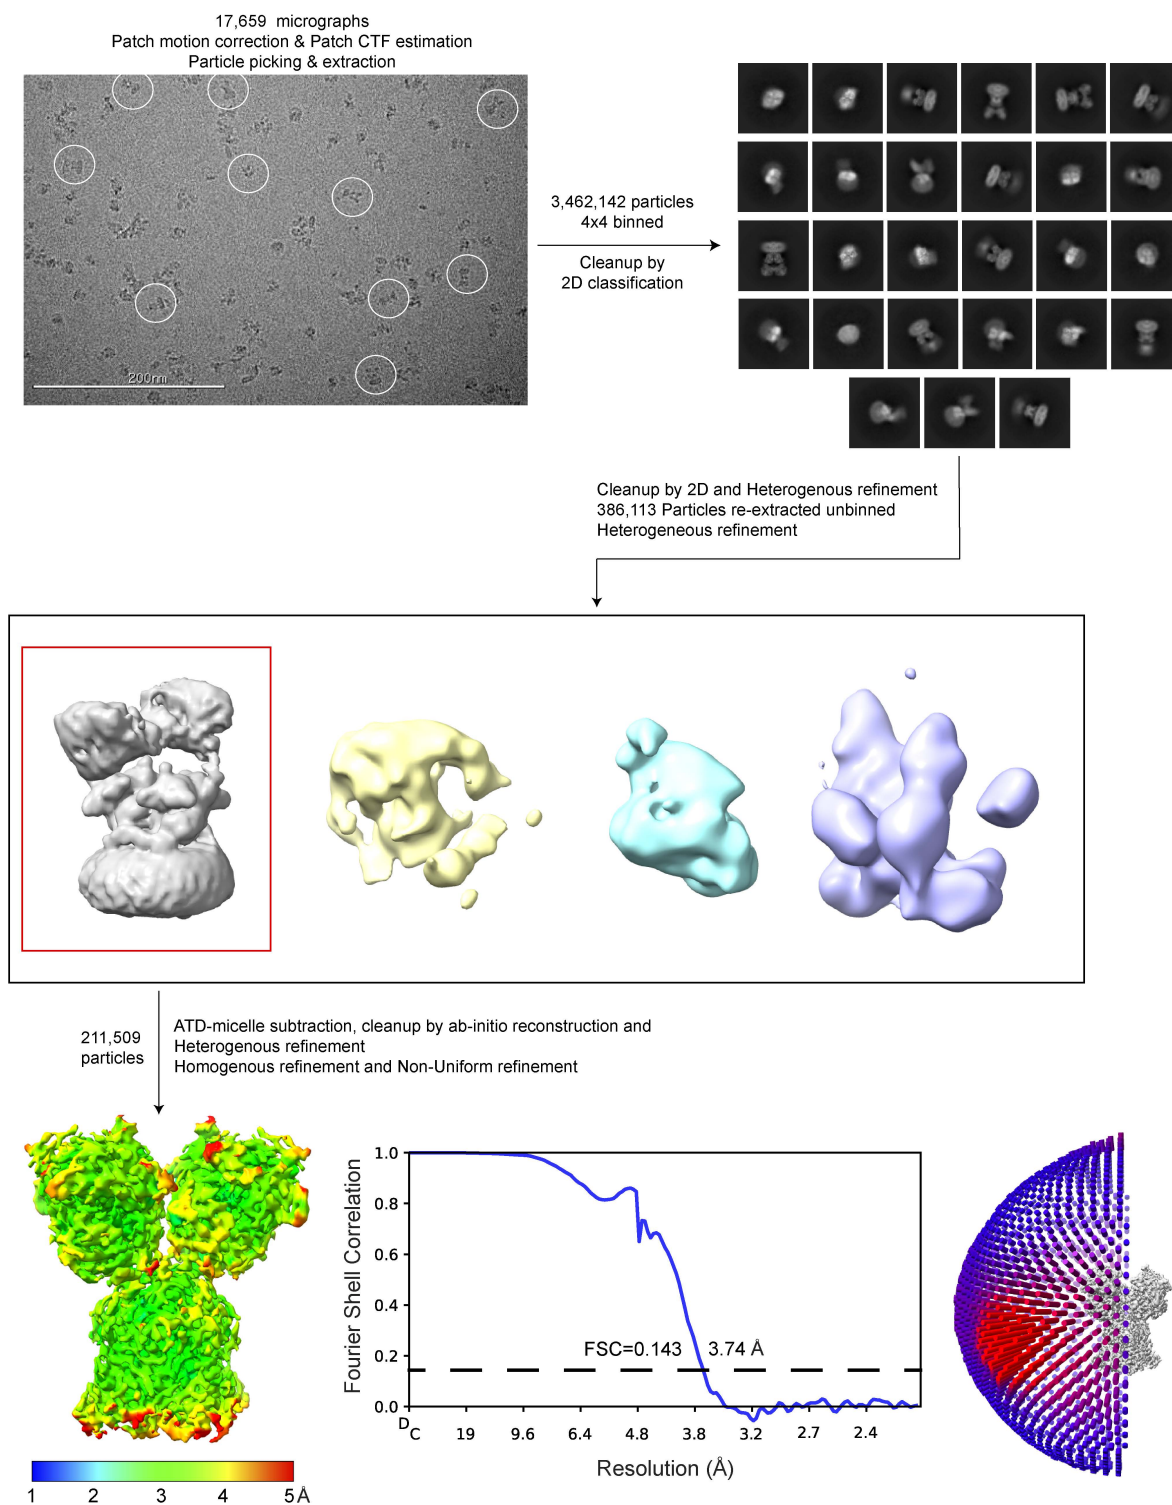

**Supplementary Fig. 3. Overview of cryo-EM for GluK2<sub>KukoA</sub>.** On the top, 3D reconstruction workflow, with a representative micrograph and 2D class averages. At the bottom, the local resolution presented as coloring of the GluK2<sub>KukoA</sub> map, FSC curve, and Euler angle distribution of particles contributing to the final reconstruction, with larger red cylinders representing orientations comprising more particles.



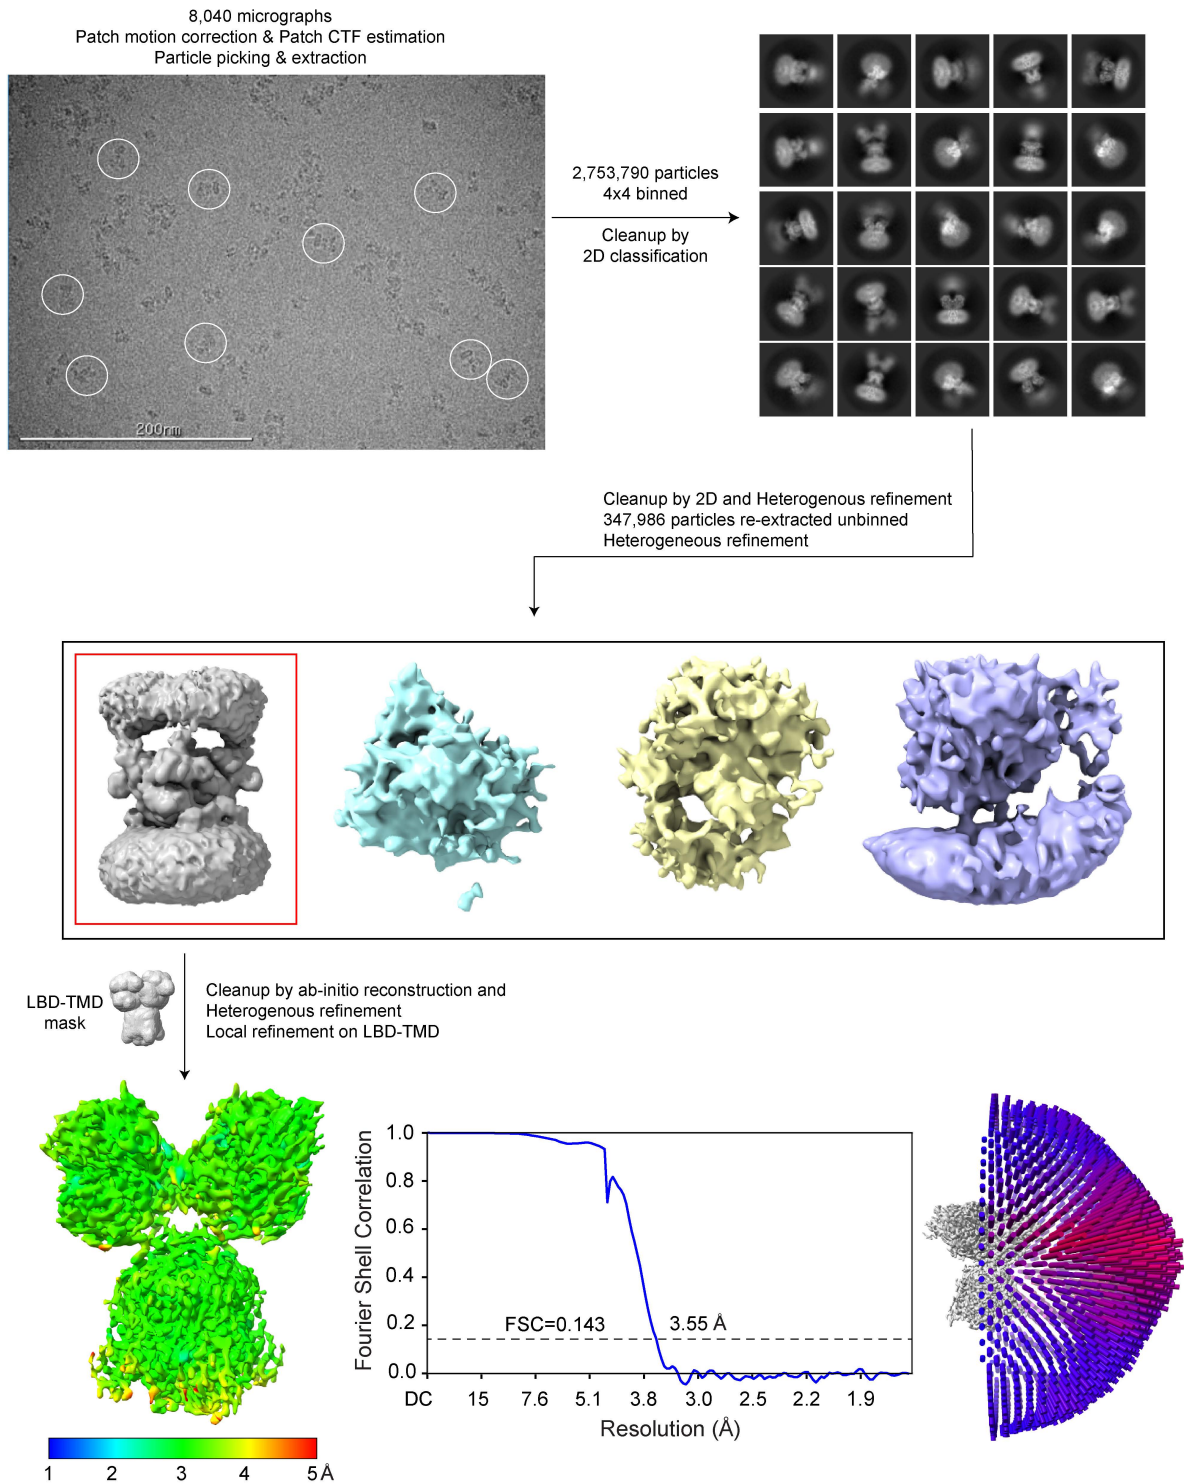

**Supplementary Fig. 4. Overview of cryo-EM for GluK2<sub>SPM</sub>.** On the top, 3D reconstruction workflow, with a representative micrograph and 2D class averages. At the bottom, the local resolution presented as coloring of the GluK2<sub>SPM</sub> map, FSC curve, and Euler angle distribution of particles contributing to the final reconstruction, with larger red cylinders representing orientations comprising more particles.

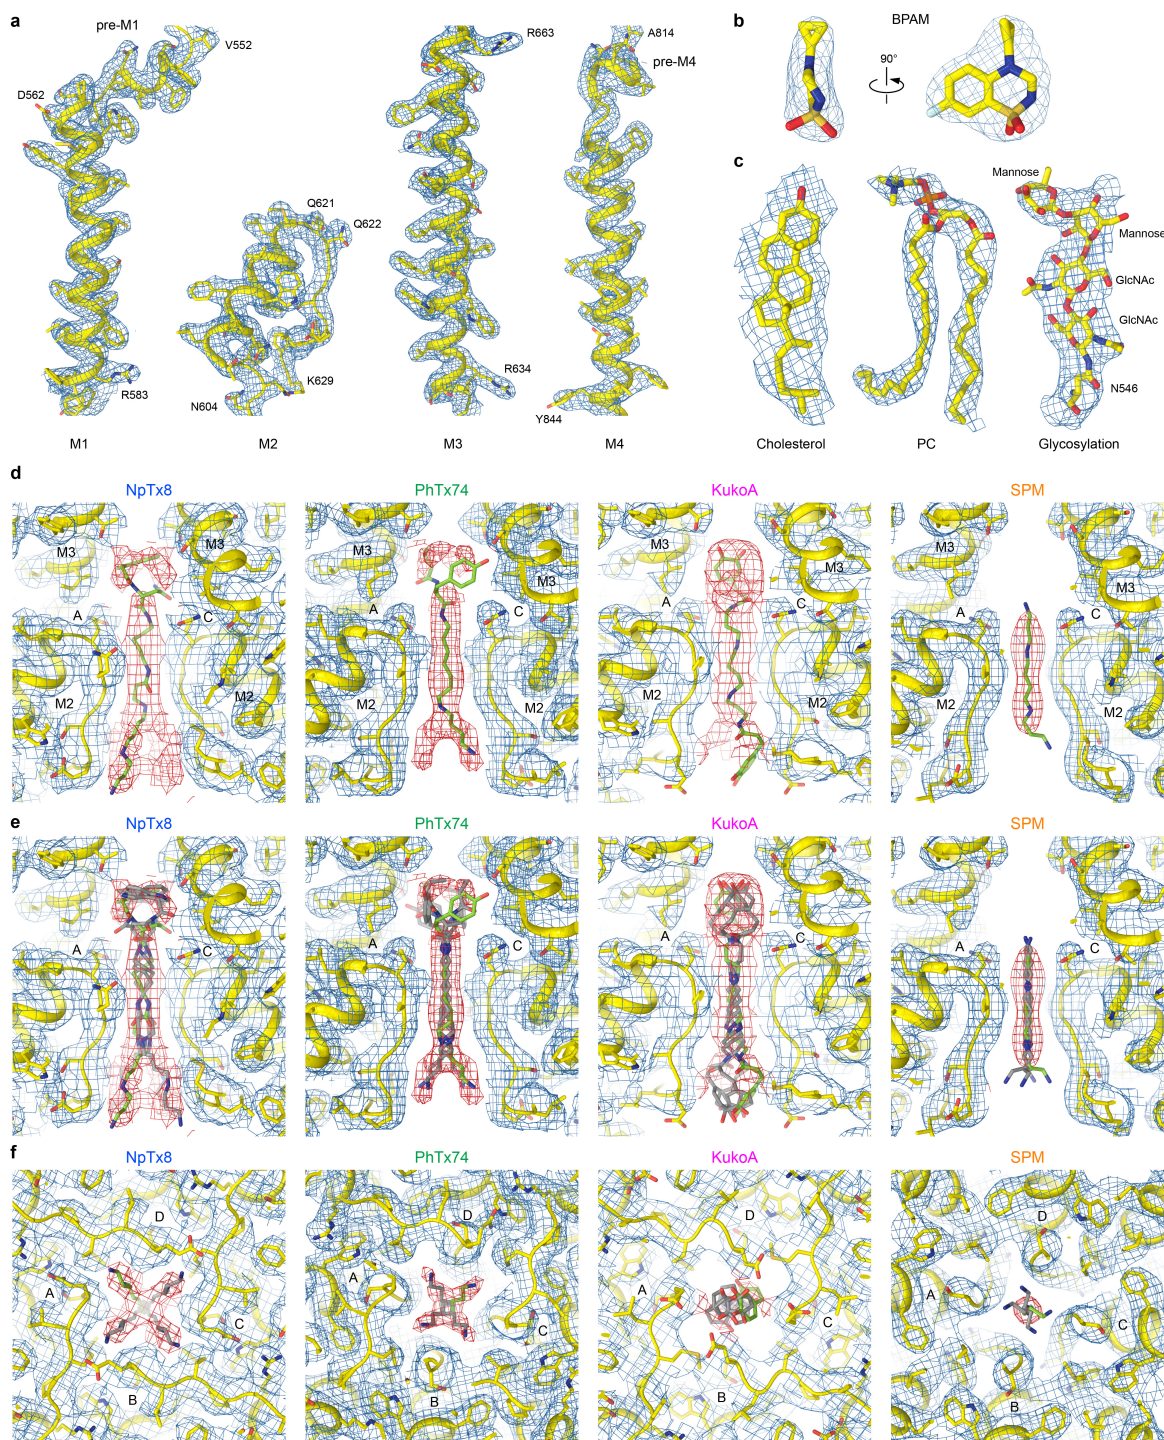

**Supplementary Fig. 5. Cryo-EM density.** **a**, Fragments of the GluK2<sub>PhTx74</sub> TMD with the structural model shown as a ribbon and sticks and the corresponding cryo-EM density as a blue mesh. **b-c**, Representative GluK2<sub>PhTx74</sub> density for the positive allosteric modulator BPAM (**b**), lipids cholesterol and phosphatidylcholine (PC), and N546-linked carbohydrate (**c**), with the molecular models shown in sticks (yellow). **d-e**, Closeup view of the blocker binding site in GluK2<sub>NpTx8</sub>, GluK2<sub>PhTx74</sub>, GluK2<sub>KukoA</sub> and GluK2<sub>SPM</sub>, with density for the channel blockers and the surrounding protein shown as red and blue mesh, respectively. The protein model is shown in yellow. One fitted blocker

molecule (**d**) is shown in green, while its three equivalent poses obtained via 90-degree rotations around the axis of local 4-fold rotational symmetry (**e**) are shown in grey. Only two subunits (A and C) are shown for the protein, with the other two subunits (B and D) removed for clarity. **f**, Intracellular view of the same region as shown in **e** but with all four protein subunits present.



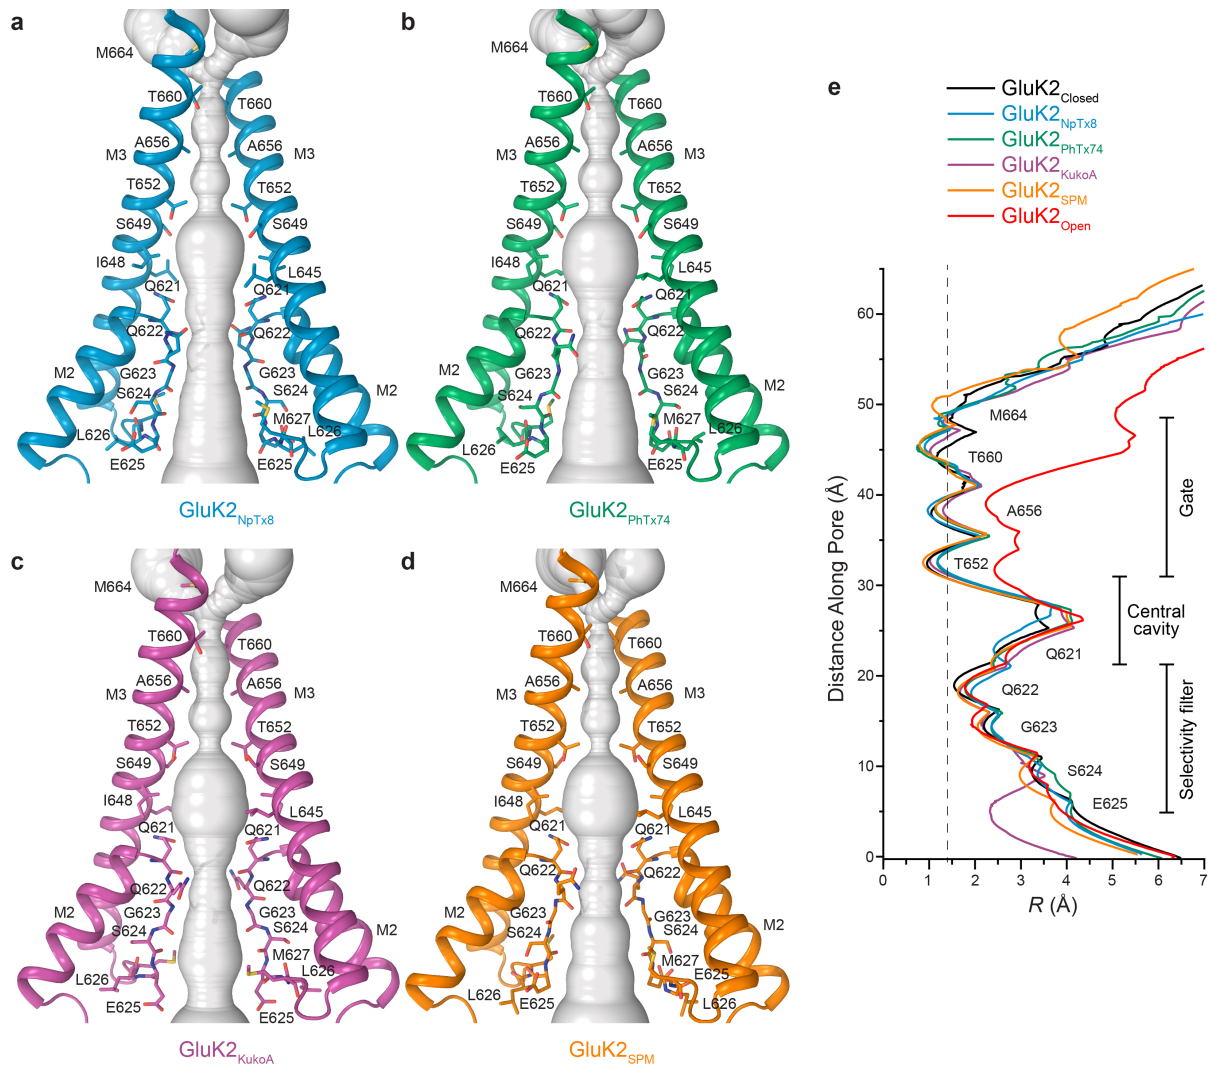

**Supplementary Fig. 6. Closed conformation of the ion channel pore.** **a-c**, Pore-forming domains M2 and M3 in GluK2<sub>NpTx8</sub> (**a**), GluK2<sub>PhTx74</sub> (**b**), GluK2<sub>KukoA</sub> (**c**) and GluK2<sub>SPM</sub> (**d**), with the residues lining pore shown as sticks. Only two (A and C) of four subunits are shown, with the front and back subunits (B and D) omitted for clarity. The pore profile is shown as a space-filling model (grey). **e**, Pore radius for GluK2<sub>Closed</sub> (black; PDB ID: 8FWS), GluK2<sub>NpTx8</sub> (blue), GluK2<sub>PhTx74</sub> (green), GluK2<sub>KukoA</sub> (violet), GluK2<sub>SPM</sub> (orange) and GluK2<sub>Open</sub> (red; PDB ID: 9B35) calculated using HOLE. The vertical dashed line denotes the radius of a water molecule, 1.4 Å.



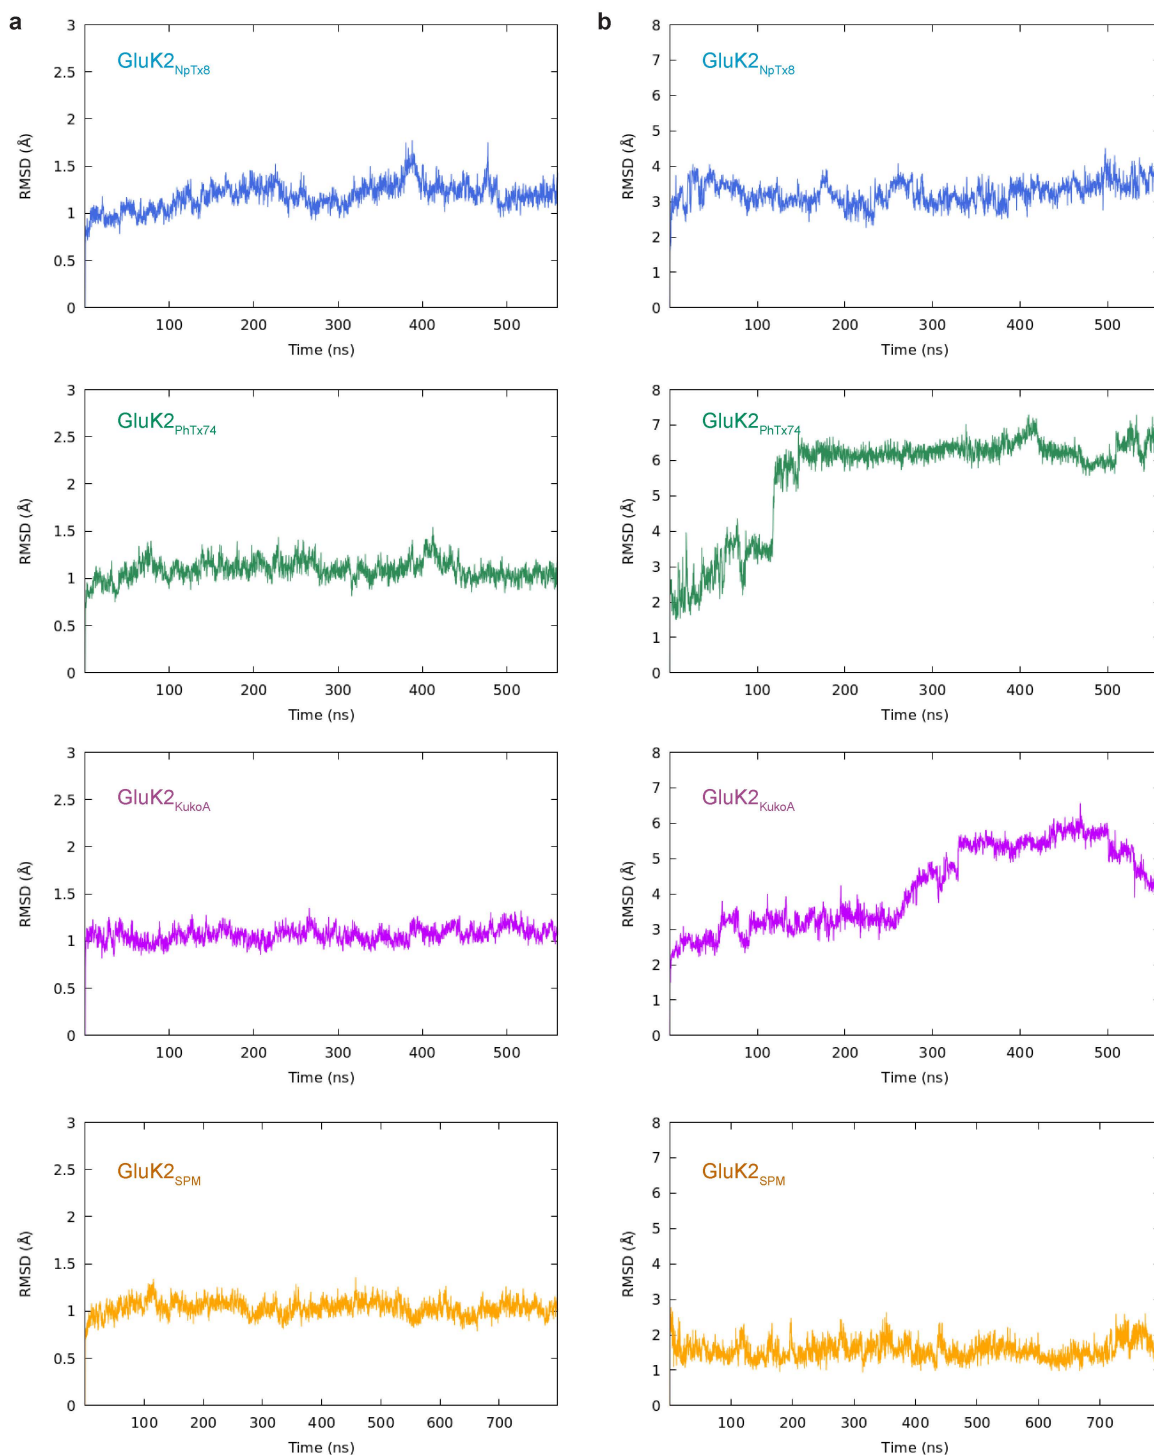

**Supplementary Fig. 7. Protein and blocker stability during MD simulations.** **a**, Root-mean square deviation (RMSD) from the initial structures in the production runs for GluK2<sub>NpTx8</sub> (blue), GluK2<sub>PhTx74</sub> (green), GluK2<sub>KukoA</sub> (violet) and GluK2<sub>SPM</sub> (orange) systems. For each system, C $\alpha$  RMSDs of the M1-4 TMD segments are shown. **b**, RMSDs of the blocker molecules NpTx-8 (blue), PhTx-74 (green), KukoA (violet) and SPM (orange), from the initial conformations in the production runs of corresponding systems. The alignment was done by the TMD helices and the heavy-atom RMSDs of the blockers in each system are shown.

**Supplementary Table 1. Heavy-atom contact frequencies between the channel blockers and key protein residues during the simulations.** Contacts that lasted for less than 60% of the simulation are not shown.

| Simulation System        | GluK2 Subunit | Contact Frequency (%) |       |       |        |       |       |       |       |       |       |
|--------------------------|---------------|-----------------------|-------|-------|--------|-------|-------|-------|-------|-------|-------|
|                          |               | Q621                  | Q622  | G623  | S624   | E625  | M627  | L645  | I648  | S649  | T652  |
| GluK2 <sub>SPM</sub>     | A             | 99.70                 | 98.07 | -     | 62.14  | 89.16 | -     | -     | -     | -     | -     |
|                          | B             | 98.67                 | 90.19 | -     | -      | -     | -     | -     | -     | -     | -     |
|                          | C             | 98.18                 | 84.63 | -     | -      | -     | -     | -     | -     | -     | -     |
|                          | D             | 91.83                 | 88.22 | -     | 62.56  | 69.22 | -     | -     | -     | -     | -     |
| GluK2 <sub>KukoA-1</sub> | A             | 95.72                 | 91.08 | -     | 60.10  | -     | -     | -     | -     | 70.45 | -     |
|                          | B             | 97.36                 | -     | -     | -      | -     | -     | -     | 63.05 | -     | 89.20 |
|                          | C             | 100.00                | 78.81 | -     | -      | 62.73 | -     | -     | -     | -     | -     |
|                          | D             | 99.84                 | 96.72 | -     | 72.93  | 72.41 | 67.37 | -     | 60.66 | -     | -     |
| GluK2 <sub>KukoA-2</sub> | A             | 100.00                | 96.81 | -     | 80.07  | -     | -     | -     | 84.95 | -     | -     |
|                          | B             | 95.38                 | -     | -     | -      | -     | -     | -     | -     | -     | -     |
|                          | C             | 98.19                 | 98.38 | -     | -      | -     | -     | -     | 75.64 | -     | 87.13 |
|                          | D             | 99.81                 | 73.33 | 97.75 | 100.00 | -     | 99.94 | 83.76 | 68.96 | -     | 79.89 |
| GluK2 <sub>NpTx8</sub>   | A             | 84.36                 | -     | -     | -      | -     | -     | 82.50 | 65.52 | -     | -     |
|                          | B             | 96.54                 | 90.36 | -     | -      | -     | -     | -     | -     | -     | -     |
|                          | C             | 100.00                | 98.34 | 94.82 | -      | -     | -     | -     | 83.84 | 94.77 | 60.70 |
|                          | D             | 97.84                 | 99.80 | -     | -      | -     | -     | -     | -     | -     | 83.04 |
| GluK2 <sub>PhTx74</sub>  | A             | 79.95                 | -     | -     | -      | -     | -     | 61.45 | 73.57 | 92.25 | 78.82 |
|                          | B             | 99.95                 | 63.86 | -     | -      | -     | -     | 66.30 | 95.07 | -     | 98.20 |
|                          | C             | 99.11                 | -     | -     | -      | -     | -     | -     | 69.45 | 80.27 | 99.73 |
|                          | D             | 98.93                 | -     | -     | -      | -     | -     | -     | -     | -     | 74.75 |

**Supplementary Table 2. List of hydrogen bond interactions between the channel blockers and the binding site residues.** Duty fraction refers to the percentage of frames in which a given hydrogen bond is present in the trajectory. Hydrogen bonds that persist less than 20% of the trajectory are not listed. Single asterisk (\*) indicates the alternating hydrogen bond atoms within the same residue. Double asterisk (\*\*) indicates the alternating hydrogen bonds among the subunits.

| Simulation System        | GluK2 Subunit | Hydrogen bonds (Acceptor-Donor)                                                                                                                           | Duty Fraction (%)                                  |
|--------------------------|---------------|-----------------------------------------------------------------------------------------------------------------------------------------------------------|----------------------------------------------------|
| GluK2 <sub>SPM</sub>     | A             | **Q621:O-----SPM:N5<br>**Q622:O-----SPM:N10<br>*E625:OE1/2-----SPM:N14<br>**Q621:OE1-----SPM:N1                                                           | 89.38<br>47.93<br>100.00<br>57.27                  |
|                          | B             | **Q621:O-----SPM:N5<br>**Q621:OE1-----SPM:N1<br>*E625:OE1/2-----SPM:N14                                                                                   | 67.77<br>39.58<br>26.02                            |
|                          | C             | **Q621:O-----SPM:N5<br>*E625:OE1/2-----SPM:N14<br>**Q621:OE1-----SPM:N1<br>**Q622:O-----SPM:N10                                                           | 23.73<br>31.85<br>21.3<br>25.70                    |
|                          | D             | **Q621:O-----SPM:N5<br>*E625:OE1/2-----SPM:N14<br>**Q622:O-----SPM:N10<br>**Q621:OE1-----SPM:N1<br>S624:O-----SPM:N14                                     | 44.97<br>100.00<br>44.32<br>34.09<br>22.49         |
| GluK2 <sub>KukoA-1</sub> | A             | **Q622:O-----KUK:N15<br>Q621:OE1-----KUK:N24<br>**Q621:O-----KUK:N20                                                                                      | 52.2<br>45.04<br>38.90                             |
|                          | B             | T652:OG1-----KUK:O35<br>**Q621:O-----KUK:N20                                                                                                              | 74.00<br>20.01                                     |
|                          | C             | **Q621:O-----KUK:N20<br>KUK:O26-----Q621:NE2<br>**Q622:O-----KUK:N15                                                                                      | 72.44<br>95.40<br>43.11                            |
|                          | D             | **Q621:O-----KUK:N20<br>**Q622:O-----KUK:N15                                                                                                              | 83.36<br>64.04                                     |
| GluK2 <sub>KukoA-2</sub> | A             | Q622:O-----KUK:O37<br>*Q621:OE1/NE2-----KUK:O36                                                                                                           | 93.38<br>99.07                                     |
|                          | B             | **Q622:O-----KUK:N11                                                                                                                                      | 35.35                                              |
|                          | C             | **Q621:O-----KUK:N15<br>KUK:O26-----T652:OG1<br>KUK:O10-----S624:N<br>**Q621:OE1-----KUK:N20                                                              | 34.54<br>66.46<br>31.54<br>40.23                   |
|                          | D             | **Q622:O-----KUK:N11<br>**Q621:O-----KUK:N15<br>*Q621:OE1/NE2-----KUK:O35<br>**Q621:OE1-----KUK:N20<br>*KUK:O35/36-----Q621:NE2<br>*KUK:O37/38-----S624:N | 56.53<br>59.90<br>35.11<br>50.47<br>98.87<br>50.66 |
| GluK2 <sub>NpTx8</sub>   | A             | Q621:OE1-----NTX:N6<br>S624:O-----NTX:N2<br>*E625:OE1/2-----NTX:N1<br>Q622:OE1-----NTX:N3<br>Q621:O-----NTX:N4                                            | 63.28<br>26.65<br>56.25<br>29.90<br>61.17          |
|                          | B             | **Q622:O-----NTX:N3<br>*E625:OE1/2-----NTX:N1<br>NTX:O4-----Q621:NE2<br>NTX:O3-----T652:OG1                                                               | 63.24<br>53.93<br>53.02<br>23.09                   |
|                          | C             | S649:OG-----NTX:N8<br>Q621:OE1-----NTX:N8                                                                                                                 | 56.23<br>37.38                                     |
|                          | D             | *Q622:OE1/NE2-----NTX:N4<br>**Q622:O-----NTX:N3                                                                                                           | 97.73<br>25.38                                     |
| GluK2 <sub>PnTx74</sub>  | A             | **Q622:O-----PTX:N4<br>PTX:O1-----T652:OG1                                                                                                                | 56.02<br>22.94                                     |
|                          | B             | Q621:OE1/NE2-----PTX:O2<br>**Q622:O-----PTX:N4<br>Q621:O-----PTX:N3<br>PTX:O1-----T652:OG1<br>PTX:O2-----Q621:NE2                                         | 100.00<br>37.36<br>20.43<br>81.84<br>36.64         |
|                          | C             | **Q621:O-----PTX:N3<br>PTX:O3-----T652:OG1<br>**Q622:O-----PTX:N4                                                                                         | 22.82<br>57.02<br>22.13                            |
|                          | D             | **Q621:O-----PTX:N3                                                                                                                                       | 78.68                                              |

**Supplementary Table 3. List of hydrophobic interactions between the channel blockers and the hydrophobic side chains of the binding site residues.** Duty fraction refers to the percentage of frames in which a given hydrophobic contact is present in the trajectory. Contacts that persist less than 20% of the trajectory are not listed.

| Simulation System        | GluK2 Subunit        | Hydrophobic Contacts | Duty Fraction (%) |
|--------------------------|----------------------|----------------------|-------------------|
| GluK2 <sub>SPM</sub>     | A                    | -                    | -                 |
|                          | B                    | -                    | -                 |
|                          | C                    | -                    | -                 |
|                          | D                    | -                    | -                 |
| GluK2 <sub>KukoA-1</sub> | A                    | KUK:C34-----I648:CG2 | 29.70             |
|                          | B                    | -                    | -                 |
|                          | C                    | KUK:C28-----I648:CG2 | 33.10             |
|                          | D                    | KUK:C27-----I648:CD1 | 47.00             |
| GluK2 <sub>KukoA-2</sub> | A                    | KUK:C31-----I648:CG2 | 36.50             |
|                          |                      | KUK:C30-----I648:CG2 | 30.90             |
|                          |                      | KUK:C32-----I648:CG2 | 25.70             |
|                          |                      | KUK:C30-----T652:CG2 | 20.10             |
|                          | B                    | -                    | -                 |
|                          | C                    | KUK:C23-----I648:CG1 | 34.80             |
|                          |                      | KUK:C23-----I648:CG2 | 25.90             |
|                          | D                    | KUK:C4-----M627:CE   | 97.40             |
|                          |                      | KUK:C3-----M627:CE   | 91.40             |
|                          |                      | KUK:C2-----M627:CG   | 81.60             |
|                          |                      | KUK:C3-----M627:CG   | 81.10             |
|                          |                      | KUK:C5-----M627:CE   | 80.00             |
|                          |                      | KUK:C2-----M627:CE   | 49.90             |
|                          |                      | KUK:C6-----M627:CE   | 38.10             |
|                          |                      | KUK:C1-----M627:CE   | 24.70             |
| KUK:C3-----G623:C        | 23.30                |                      |                   |
| KUK:C33-----L645:CD1     | 23.00                |                      |                   |
| KUK:C33-----I648:C       | 22.20                |                      |                   |
| GluK2 <sub>NpTx8</sub>   | A                    | NTX:C18-----L645:CD1 | 47.40             |
|                          |                      | NTX:C19-----L645:CD1 | 29.20             |
|                          |                      | NTX:C18-----I648:CG2 | 35.40             |
|                          | B                    | NTX:C21-----L645:CD1 | 33.60             |
|                          |                      | NTX:C20-----I648:CG2 | 29.80             |
|                          | C                    | NTX:C23-----I648:CG2 | 61.10             |
|                          |                      | NTX:C22-----I648:CG2 | 34.40             |
| NTX:C24-----I648:CG2     |                      | 27.90                |                   |
| NTX:C21-----I648:CG2     |                      | 22.70                |                   |
| D                        | NTX:C28-----T652:CG2 | 25.50                |                   |
| GluK2 <sub>PhTx74</sub>  | A                    | PTX:C1-----L645:CD1  | 43.00             |
|                          |                      | PTX:C3-----I648:CG2  | 31.80             |
|                          |                      | PTX:C1-----I648:CG2  | 23.90             |
|                          |                      | NTX:C4-----T652:CG2  | 20.20             |
|                          | B                    | PTX:C12-----I648:CG2 | 72.80             |
|                          |                      | PTX:C11-----I648:CG2 | 65.70             |
|                          |                      | PTX:C7-----I648:CG2  | 44.00             |
|                          |                      | PTX:C9-----L645:CD1  | 35.90             |
|                          |                      | PTX:C12-----I648:CG1 | 32.70             |
|                          |                      | PTX:C10-----I648:CG2 | 32.00             |
|                          |                      | PTX:C9-----I648:CG2  | 24.80             |
|                          |                      | PTX:C8-----I648:CG2  | 24.20             |
|                          | C                    | PTX:C9-----I648:CG2  | 47.10             |
|                          |                      | PTX:C15-----L645:CD1 | 27.60             |
|                          |                      | PTX:C17-----L645:CD1 | 27.20             |
| D                        | -                    | -                    |                   |
